# Supplementary material for: Generalized background error covariance matrix model (GEN_BE v2.0)
Source: Copernicus journal article supplement (doi:10.5194/gmd-8-669-2015), 2015-03-20
Supplement: Supplementary file 1 [file gmd-8-669-2015-supplement.zip]

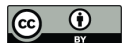

## *Supplement of*

## **Generalized background error covariance matrix model (GEN\_BE v2.0)**

**G. Descombes et al.**

*Correspondence to:* G. Descombes (gael@ucar.edu)

- gmd-8-669-2015-supplement-cover-letter.pdf
- supplement
  - \_\_MACOSX
    - \* code
  - code
    - \* Makefile
    - \* README.txt
    - \* arch
    - \* clean
    - \* compile
    - \* configure
    - \* external
    - \* scripts
    - \* src
